# Supplementary material
Source: PubMed Central journal article supplement (PMC4470617)
Supplement: NIHMS696860-supplement-Supplement1.pdf [file NIHMS696860-supplement-Supplement1.pdf]

## Supplementary Appendix

This appendix has been provided by the authors to give readers additional information about their work.

Supplement to: Yatsenko AN, Georgiadis AP, Röpke A, et al. X-linked *TEX11* mutations, meiotic arrest, and azoospermia in infertile men. *N Engl J Med* 2015;372:2097-107. DOI: 10.1056/NEJMoa1406192

## Supplementary Materials

### Table of Contents

|                           |       |
|---------------------------|-------|
| <b>Methods</b> .....      | 3     |
| Immunohistochemistry..... | 3     |
| <b>Figure S1</b> .....    | 4     |
| <b>Figure S2</b> .....    | 5     |
| <b>Figure S3</b> .....    | 6     |
| <b>Figure S4</b> .....    | 7     |
| <b>Figure S5</b> .....    | 8     |
| <b>Figure S6</b> .....    | 9     |
| <b>Figure S7</b> .....    | 10    |
| <b>Table S1</b> .....     | 11,12 |
| <b>Table S2</b> .....     | 13    |
| <b>Table S3</b> .....     | 14-24 |
| <b>Table S4</b> .....     | 25    |
| <b>Table S5</b> .....     | 26    |

## **Methods**

### **Immunohistochemistry**

The normal mouse and monkey tissue were obtained from the biobank of CeRA. All tissue sections became available from previous experimental studies on animals approved by LANUV NRW. Mouse, primate, and human testicular tissue sections were stained with primary antibody against TEX11 (goat polyclonal anti-TEX11, ab99461, dilution of 1:100; Abcam, Cambridge, MA) and visualized using 3, 3'-diaminobenzidine (D4168, Sigma-Aldrich, St. Louis, MO) and hematoxylin as counterstain. Paraffin wax was removed from testicular tissue sections using ProTaq Clear solvent (Quartett Immunodiagnostika and Biotechnologie, Berlin, Germany), and sections were subsequently rehydrated in a series of decreasing concentrations of ethanol. After rinsing with distilled water and Tris-buffered saline (TBS), sections were placed into citrate buffer (pH 6) and heated by microwave for 12 min for antigen retrieval. After cooling to room temperature (RT), sections were washed in TBS, and non-specific peroxidases were blocked with 3% H<sub>2</sub>O<sub>2</sub> for 15 min at RT. To block non-specific binding sites, sections were incubated with 10% chicken serum in TBS containing 5% bovine serum albumin for 20 min at RT. Primary antibodies against TEX11 (goat polyclonal anti-TEX11, ab99461, dilution of 1:100; Abcam) were applied, and sections were incubated overnight in a humid chamber at 4°C. After three washes in TBS, primary antibody was detected using the secondary antibody (chicken-anti-goat-HRP, sc-2984, dilution 1:250; Santa Cruz Biotechnology, Dallas, TX). Staining was visualized using 3, 3'-diaminobenzidine (D4168, Sigma-Aldrich) and hematoxylin as counterstain.

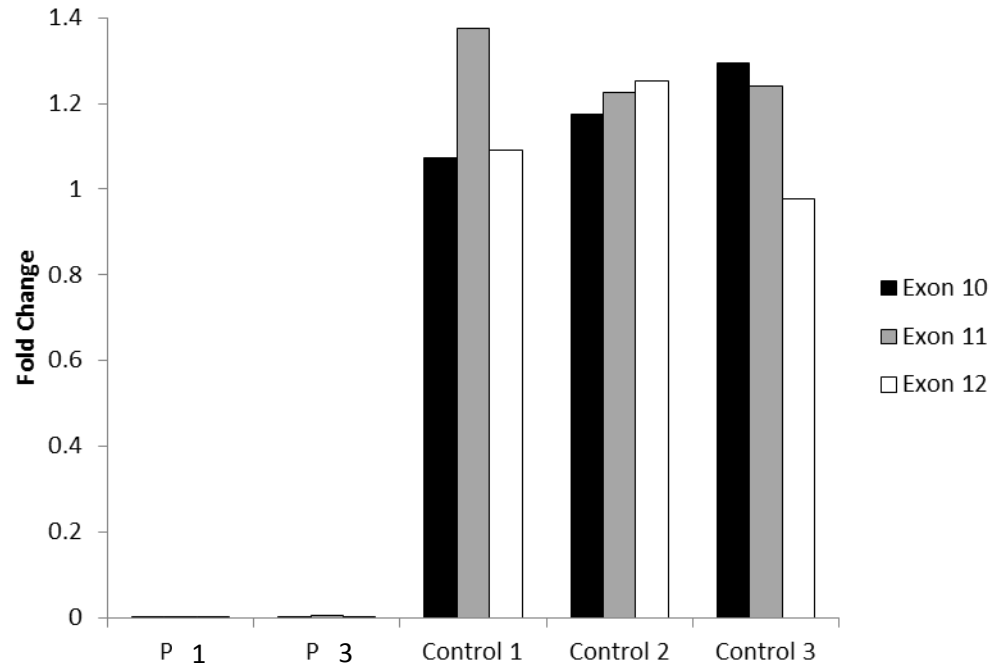

**Figure S1. qPCR analysis of exons 10-12 of *TEX11*.** Samples fold-change calculated by delta Ct with beta-actin serving as an internal control. Patients 1 and 3 showed no amplification of *TEX11* exons 10-12 products. Normal samples 1, 2, and 3 served as controls and display a fold-change of 1.19 +/- 0.12, consistent with one copy of *TEX11*.

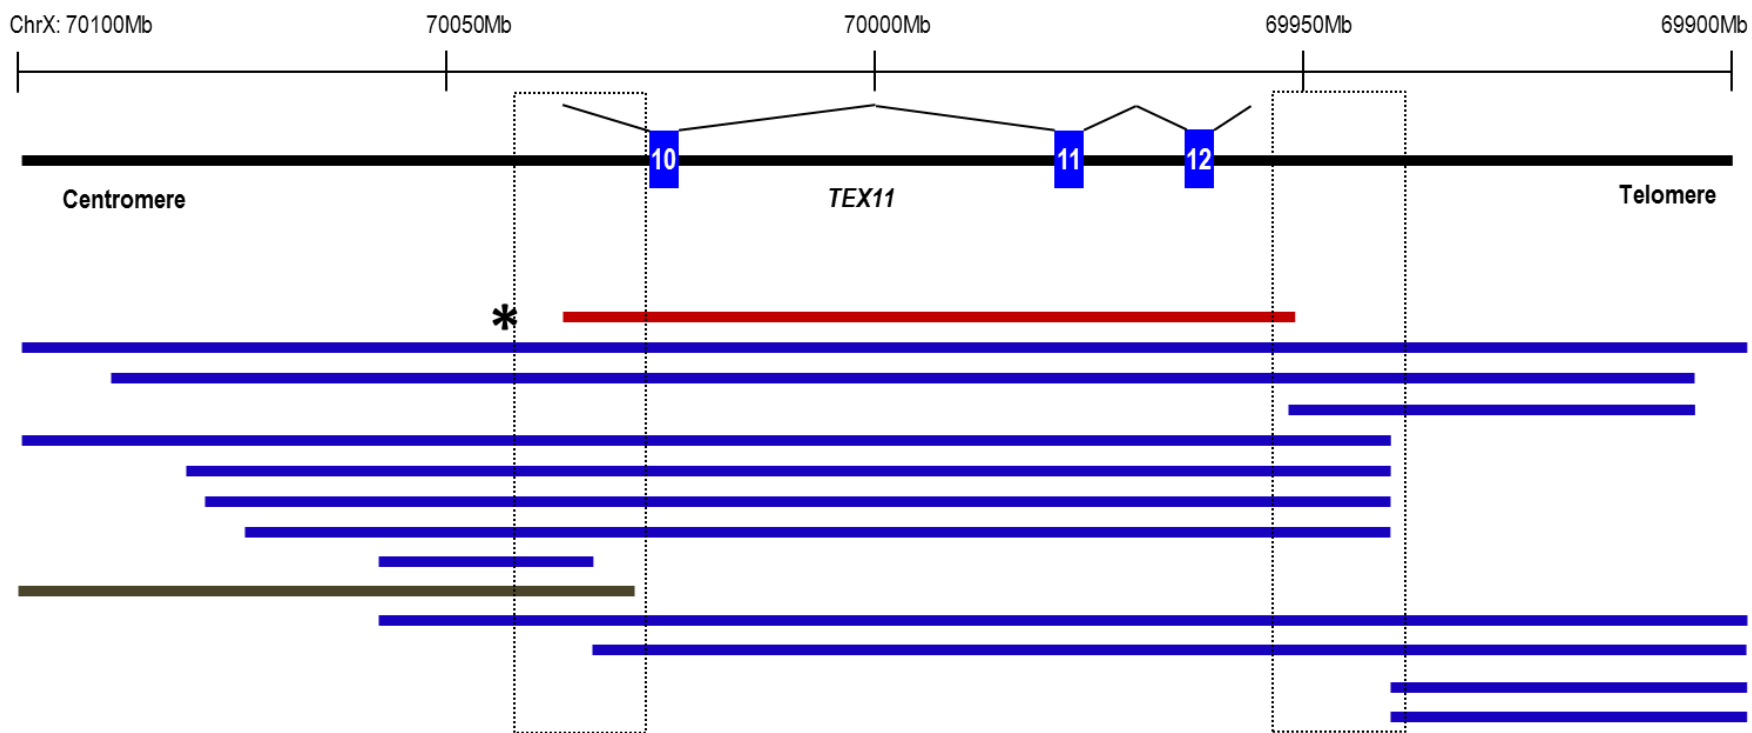

**Figure S2. Reported structural variations in a general population from the Database of Genomic Variants (DGV) around exons 10-12 of *TEX11*.** The asterisked 99 Kb deletion (red line) represents the CNV found in Patients 1 and 3. The duplications (blue lines) and complex CNVs (brown line) are reported structural variations in the DGV. Dashed rectangles indicate that the area around breakpoints of the deletion found in Patients 1 and 3. Note that breakpoints of CNVs are clustered around the Patients 1 and 3 deletion breakpoints, indicating DNA intervals prone to breakage.

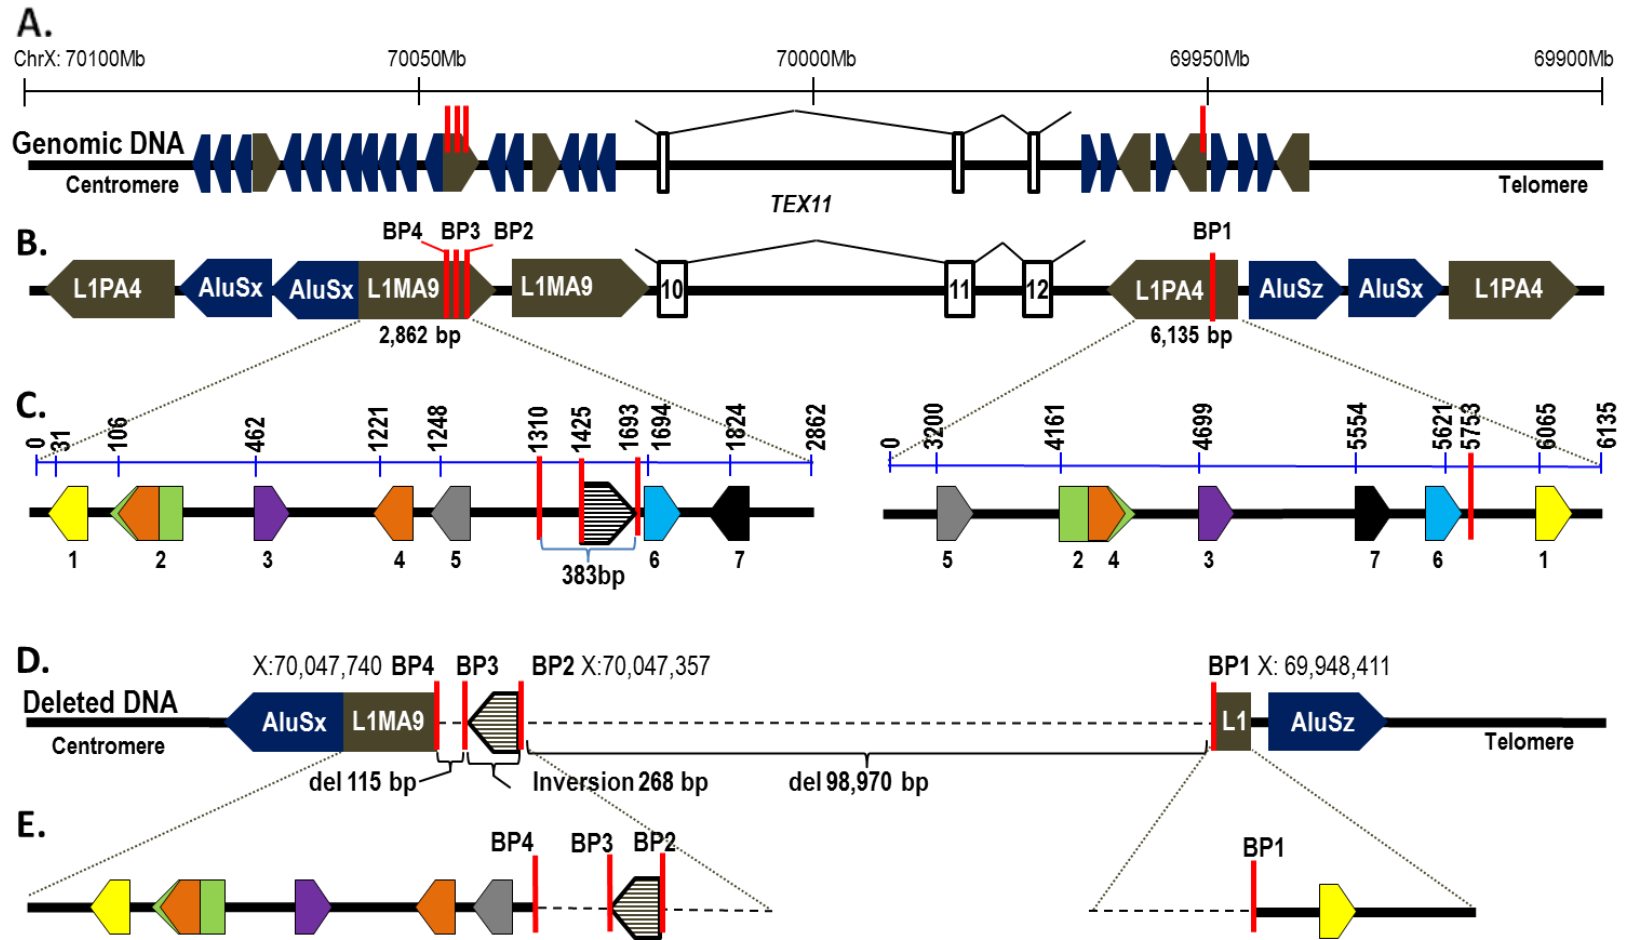

**Figure S3. Breakpoint analysis for the deletion of exons 10-12 in patients 1 and 3.** **A.** Reference DNA depicting LINE (brown arrows) and Alu (blue arrows) repeats flanking four breakpoint regions (orange vertical lines) around exons 10-12 (black outlined open rectangles). **B.** Magnified view of significant LINE and Alu repeats around breakpoints. **C.** Genomic structure of L1MA9 and L1PA4 repeats with shared microhomology around breakpoints BP1-4. Colored arrows correspond to identical microhomology regions in opposing LINE repeat. Blue line and numbers indicate position of microhomology region in LINE repeat. **D.** *TEX11* (black solid line) deletion of 115 bp (dotted lines), a short inversion of 268 bp in intron 9 (striped arrow), and a 98,970 pb deletion of exons 10-12 (dotted lines). **E.** A magnified view of breakpoint regions inside of LINE repeats.

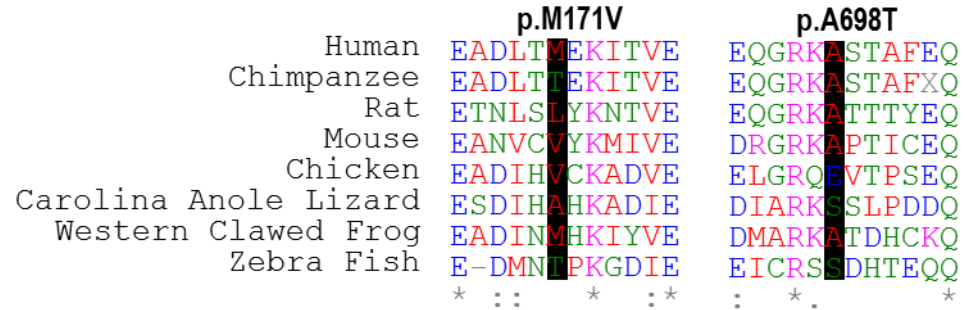

**Figure S4. Multiple protein alignment of 2 missense mutations in the TEX11 amino acid sequence.** The methionine amino acid at position 171 was changed to valine, and is not conserved, but it is adjacent to a conserved region. The protein sequence is highly conserved from amino acid position 189 through the entire SPO22 domain. The conserved alanine-698, was mutated to threonine and falls into another conserved region.

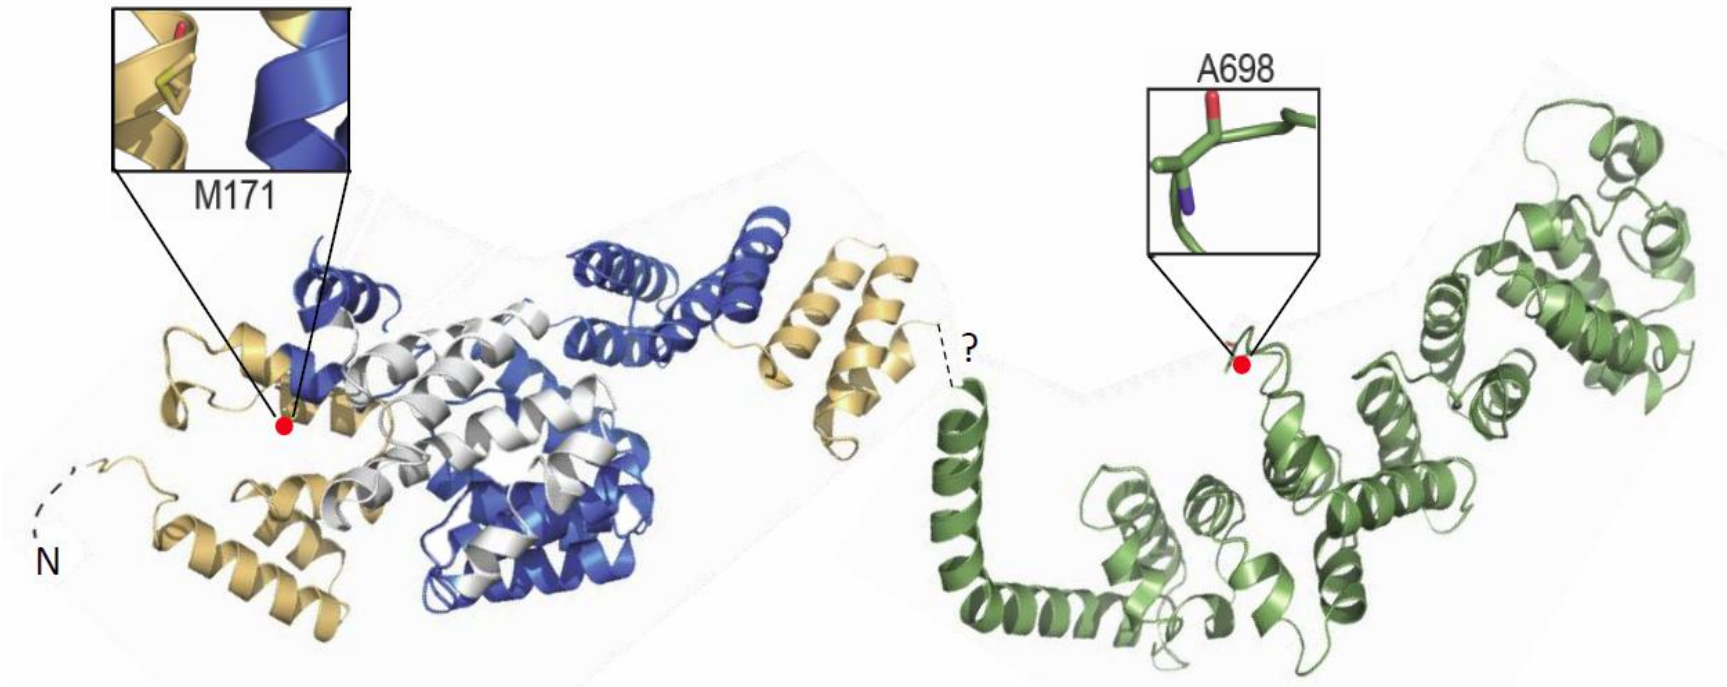

**Figure S5. Tertiary TEX11 protein structure prediction.** Diagram of the top tertiary structure model from Phyre2<sup>15</sup>. The N-terminal two-thirds of TEX11, modeled with template 2XPI, is shown in blue and gold: the SPO22 domain shown in blue; the segment of SPO22 that is deleted in p.218del79aa in white; TPR1 and TPR2 in gold. The C-terminal region of TEX11, modeled with template structure 4I2W, is shown in green. Predicted locations of amino acid changes in the genetic study are shown as red dots. Each inset shows the amino acid of interest as sticks on the cartoon representation of the backbone in an orientation that best shows their modeled positions. The N-terminal unmodeled region and the linker between the two structural models are shown as dotted lines. The orientation of the two domains relative to one another has not been modeled, as indicated by a question mark.



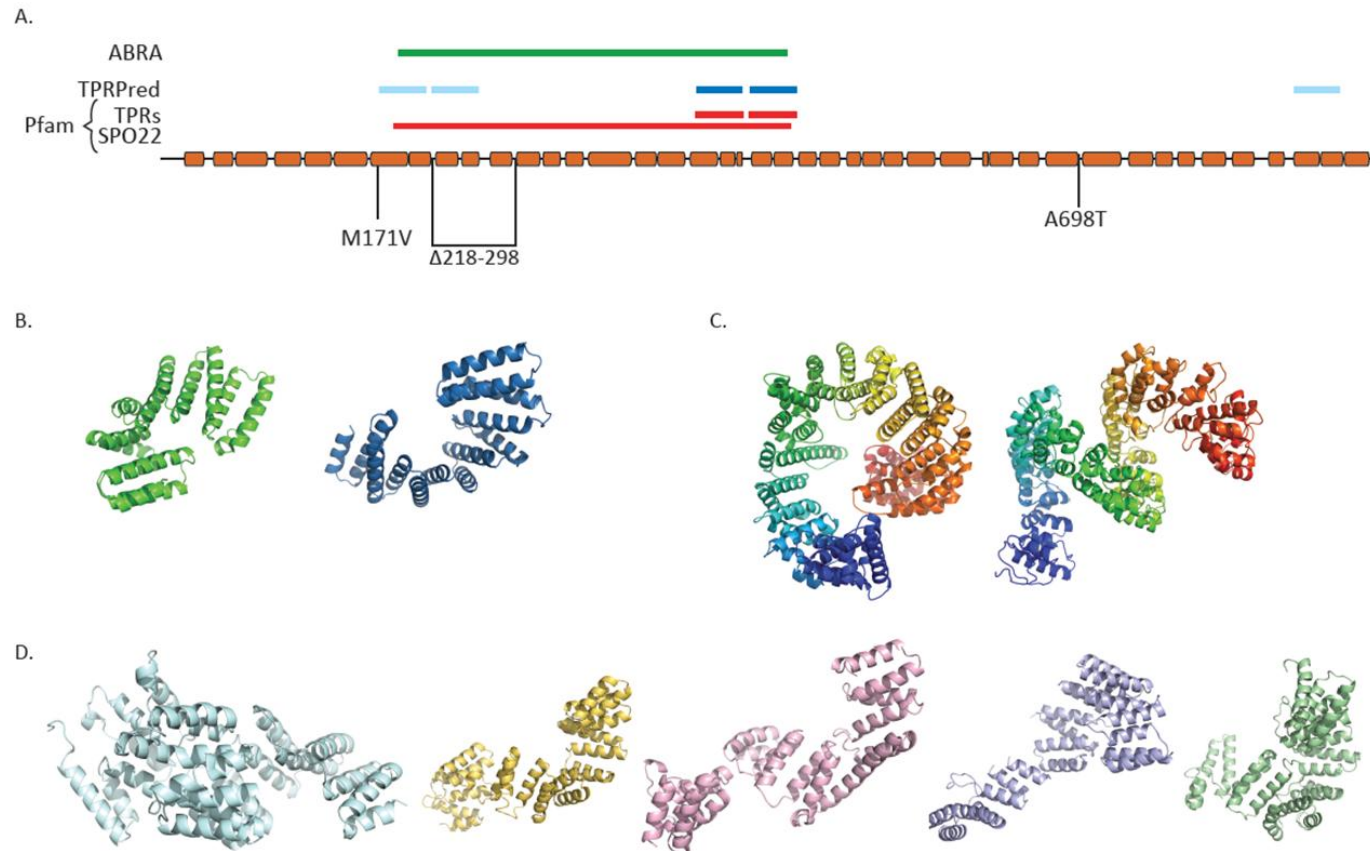

**Figure S6. Three dimensional structural protein modeling of TEX11 reveals many potential arrangements of its helical motifs. A.** Linear diagram of the secondary structure prediction of TEX11. Each orange region represents a predicted  $\alpha$ -helix. Locations of the missense mutations and deletion analyzed in this study are shown. Red bars represent elements detected by Pfam<sup>18</sup>. Blue bars represent TPRs predicted by TPRPred<sup>19</sup>, with p-values  $< 10^{-4}$  represented by dark blue bars, and p-value =  $10^{-4}$  in light blue bars. The green bar represents the TPRs predicted by ABRA. **B.** Diagrams of the two most probable models of the Spo22 domain of TEX11 modeled by I-Tasser<sup>17,20</sup>. **C.** Diagrams of the two highest ranked tertiary structure models from I-Tasser of TEX11<sup>17,20</sup>. **D.** Diagrams of the five top ranked tertiary structure models from Phyre2 of the N-terminal two-thirds of TEX11<sup>15</sup>.

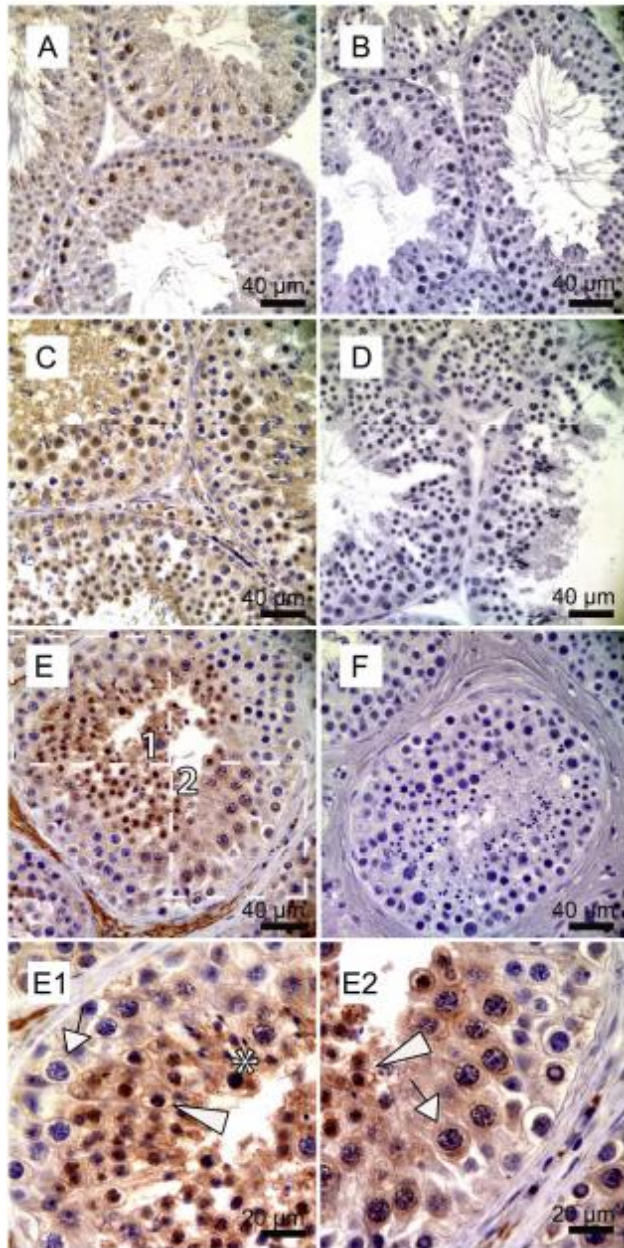

**Figure S7. Immunohistochemical detection of TEX11 in normal testicular tissue sections of mouse (A-B), macaque (*Macaca fascicularis*) (C-D), and human (E-F).** Higher magnifications of dashed subframes of Fig. E are shown in E1 and E2. Positive signal for TEX11 is visible as brown precipitate. Hematoxylin was used as counterstain. Exchange of the TEX11 antibody with a corresponding IgG antibody was used as a control for method specificity (B, D, F). In the mouse testis the positive signal is most prominent in spermatocytes (A). In primates (C) and humans (E, E1, E2), the positive staining was detected at later stages of germ cell development in comparison to the mouse. TEX11 is absent in early spermatocytes, designated by arrow (E1), and expression becomes visible in late spermatocytes, designated by arrow (E2). The staining is also present in round (designated by arrowhead) and elongating spermatids (designated by asterisk). Scale bars represent the indicated distances.

**Table S1. Genomic DNA primers for 30 coding exons of *TEX11* isoform 1 (NM\_001003811.1)\* and 2 (NM\_031276.2).**

| Primers name               | Forward                     | Reverse                    | Length (bp) |
|----------------------------|-----------------------------|----------------------------|-------------|
| Ex 2, isoform 2            | CCCTTTCATGGGCTTTAACTTTAC    | CCACCGCGCCCAGCAATATTTAG    | 274         |
| Ex 3, isoform 1            | TGTTTCATGTCATATCTTTGGTGCTT  | GACAAGAGTTGGCTTGGCACAGT    | 527         |
| <i>Ex 3, isoform 1 seq</i> | TCTTTCTTTCTTTCTTAG          | -                          | -           |
| Ex 4                       | TCCTTCATGCTGTATTCATTTGG     | CGAGCACATATGTTCCCATTGGT    | 422         |
| Ex 5                       | TGGGTAAGTTTTGCGGGGAGAGG     | TGAGGGAGGCCATTTGCTTGAGA    | 411         |
| Ex 6                       | CAACAAAACCTGGCTTCCTCAATT    | GGAACACTGAAAAGGAACACCAT    | 319         |
| Ex 7+8                     | TGCTAACTGTTGCTTTTTGTTTTCTG  | TCACCCTTAGCCACCCCATAGA     | 632         |
| Ex 9                       | ACTCTGTGTCACCAAAGATTACCACTT | GCTTTTTCAAATGCCCTTTCTGG    | 460         |
| Ex 10                      | TCTCCTAGGCTGGAGTGATGTGG     | AAGTCAGAGAAGGTTTAACTGCCAAA | 301         |
| Ex 11                      | TTGTAGTGCAAAACAGAAAAGTTGGA  | GATGTAAATGTTGTGCCCAATAGC   | 323         |
| Ex 12                      | GACTGTGGTCGCTTAAGGAAATGC    | AACATAGGAATTTGCGGGGACAC    | 431         |
| Ex 13                      | TGGGAAATATCCTCAGGGATAGAACA  | TGGGTGACAATATTTCCCTTTCC    | 406         |
| Ex 14                      | TGACACTCTCCAGCACTGGATGTTA   | ATATTGCCAAGGTTGGTCTCAAGC   | 401         |
| Ex 15                      | TCTGGCTTATTTGCTCACACTG      | GGAAGAAATCCATTGACTTGAGG    | 351         |
| Ex 16                      | AGGAGAATCAGGCAGCAGTACC      | CTTGACAATGCTCATTAACACTC    | 415         |
| Ex 17                      | TTGACCAAGACTGATAATAAAATGCA  | TTCTCTTTCTTTGGGAAGTTTCA    | 502         |
| Ex 18                      | TTGCATTAGCATTCTAGAAGAGCAC   | ATAACCTTCCACGTTTCTTTTTGC   | 442         |
| Ex 19                      | TGGTGTTCAAATCCTCCTTGAAA     | GGCATGAAAATATGAGGCAAAAC    | 423         |
| Ex 20                      | GGGGCTAATGCAAATGTGTCCTG     | CACCCTCCTGCTTCGCTATTT      | 408         |
| Ex 21                      | CTTCTCCCTCCAGAGTAATCAA      | AAGACTGGCCCCAAAACCTGTAT    | 288         |
| Ex 22                      | TGAGGGCACTGGGAATGAGTAAC     | TCTCTGCTTGTGAATGAAGAAACCA  | 412         |
| Ex 23                      | ACTTTTGGTATGCACCCCTACAC     | CCACAGCTACAATGAAAGATCCA    | 328         |
| Ex 24                      | AAGATTGGAATTGACGAGGGTCTC    | GCCCCACATTCTTATGTTATACCC   | 455         |
| Ex 25                      | GTGCTTTTCCAGCTGAATTTTCTCAT  | GAAGAGGCCACACCAAAGTAACC    | 424         |

|       |                           |                            |     |
|-------|---------------------------|----------------------------|-----|
| Ex 26 | AAGGAAATGTGCAAATAGAGGCTAA | AAGCTCCTTTCAAACCTGTGTTACC  | 301 |
| Ex 27 | TCTGTCTACAGCAGTGAAGATGAC  | TGGCATTAGAGAAGGAGAAACAAAG  | 439 |
| Ex 28 | CACCATGCTACTCTGCCAGAAA    | TTCACAAGAATGCCCCAGATCAT    | 438 |
| Ex 29 | GGCCAGATAAAACCGAGGGAAG    | TTCAGAAACCCAGGAAAATTCTGTA  | 420 |
| Ex 30 | GTGCTCTCCTCTGCACTCTCC     | CAAGGAGGATGGGGTTGAGTCCT    | 416 |
| Ex 31 | GGGGATTCTTTTCTCAAGAGA     | TTCAGCATGCTTTTATTTAGAAAGTT | 410 |

*\*Exons are labeled according to isoform 1.*

*All forward and reverse primers were used for both PCR and Sanger Sequencing, excluding exon 3 isoform 1. For this exon, forward and reverse primers were used for PCR, the reverse primer was used for sequencing in the reverse direction, and the exon 3 isoform 1 seq primer was used for sequencing in the forward direction.*

**Table S2. Genomic DNA primers for quantitative PCR of *TEX11* exons 10-12 isoform 1 (NM\_001003811.1).**

| <b>Primer name</b> | <b>Forward</b>           | <b>Reverse</b>            | <b>Length (bp)</b> |
|--------------------|--------------------------|---------------------------|--------------------|
| Ex 10              | ACTTCAAGTCTTCATCATCTCTGT | ATCCCGAGTTTACATTCAGTTTT   | 123                |
| Ex 11              | AGCTATGATATTGGGAAGATGGA  | ATGGGGAGTACGCTATTATAATTTT | 137                |
| Ex 12              | ACAGGCTAAAGTTCTACGGCTA   | AGCCCCATACCTTGTTTGCTAG    | 110                |
| <i>ACTB</i>        | CGTACCACTGGCATCGTGAT     | GCTCGGTGAGGATCTTCATGA     | 148                |

**Table S3. Total copy number variation (CNV) report for 15 azoospermic men analyzed by array comparative genomic hybridization (aCGH).**

CNV is Copy number variant, Chr denotes chromosome, kb is kilo bases or thousand bases, cytoband is chromosome band, DGV is the database of genomic variants.

| CNV | Chr | Start       | End         | Size, kb | Genome coordinates       | Cytoband | #Probes | Copy number | Number of genes | Number of patients | DGV         |
|-----|-----|-------------|-------------|----------|--------------------------|----------|---------|-------------|-----------------|--------------------|-------------|
| 1   | 1   | 12,846,934  | 12,870,823  | 23,889   | chr1:12846934-12870823   | p36.21   | 4       | loss        | 0               | 2                  | present     |
| 2   | 1   | 144,986,366 | 145,064,610 | 78,244   | chr1:144986366-145064610 | q21.1    | 19      | loss        | 1               | 2                  | present     |
| 3   | 1   | 149,041,933 | 149,230,698 | 188,765  | chr1:149041933-149230698 | q21.2    | 23      | loss        | 1               | 8                  | present     |
| 4   | 1   | 151,333,124 | 151,405,013 | 71,889   | chr1:151333124-151405013 | q21.3    | 16      | gain        | 3               | 1                  | present     |
| 5   | 1   | 1,521,481   | 1,540,027   | 18,546   | chr1:1521481-1540027     | p36.33   | 6       | loss        | 0               | 2                  | present     |
| 6   | 1   | 152,553,255 | 152,581,944 | 28,689   | chr1:152553255-152581944 | q21.3    | 7       | gain        | 1               | 13                 | present     |
| 7   | 1   | 1,651,368   | 1,664,221   | 12,853   | chr1:1651368-1664221     | p36.33   | 3       | loss        | 1               | 1                  | present     |
| 8   | 1   | 169,227,144 | 169,230,491 | 3,347    | chr1:169227144-169230491 | q24.2    | 1       | loss        | 1               | 4                  | present     |
| 9   | 1   | 16,927,124  | 17,253,438  | 326,314  | chr1:16927124-17253438   | p36.13   | 16      | gain        | 2               | 1                  | present     |
| 10  | 1   | 17,091,225  | 17,253,438  | 162,213  | chr1:17091225-17253438   | p36.13   | 9       | gain        | 0               | 1                  | not present |
| 11  | 1   | 191,826,625 | 191,864,379 | 37,754   | chr1:191826625-191864379 | q31.2    | 6       | loss        | 0               | 1                  | present     |
| 12  | 1   | 196,742,735 | 196,756,290 | 13,555   | chr1:196742735-196756290 | q31.3    | 3       | loss        | 1               | 4                  | not present |
| 13  | 1   | 206,318,836 | 206,331,282 | 12,446   | chr1:206318836-206331282 | q32.1    | 4       | loss        | 1               | 1                  | present     |
| 14  | 1   | 248,339,940 | 248,672,268 | 332,328  | chr1:248339940-248672268 | q44      | 49      | gain        | 0               | 10                 | present     |

|    |   |             |             |         |                          |       |    |      |   |    |             |
|----|---|-------------|-------------|---------|--------------------------|-------|----|------|---|----|-------------|
| 15 | 1 | 59,997,718  | 60,052,475  | 54,757  | chr1:59997718-60052475   | p32.1 | 12 | loss | 1 | 3  | present     |
| 16 | 1 | 64,841,584  | 64,848,598  | 7,014   | chr1:64841584-64848598   | p31.3 | 3  | loss | 0 | 1  | present     |
| 17 | 1 | 72,768,855  | 72,795,480  | 26,625  | chr1:72768855-72795480   | p31.1 | 5  | loss | 0 | 9  | present     |
| 18 | 2 | 126,996,699 | 127,050,268 | 53,569  | chr2:126996699-127050268 | q14.3 | 4  | loss | 0 | 1  | present     |
| 19 | 2 | 132,078,028 | 132,197,678 | 119,650 | chr2:132078028-132197678 | q21.1 | 16 | gain | 0 | 3  | present     |
| 20 | 2 | 180,069,605 | 180,070,733 | 1,128   | chr2:180069605-180070733 | q31.2 | 3  | gain | 0 | 7  | present     |
| 21 | 2 | 18,189,720  | 18,251,750  | 62,030  | chr2:18189720-18251750   | p24.2 | 10 | loss | 0 | 1  | present     |
| 22 | 2 | 186,043,764 | 186,094,608 | 50,844  | chr2:186043764-186094608 | q32.1 | 4  | loss | 0 | 1  | present     |
| 23 | 2 | 202,410,290 | 202,420,696 | 10,406  | chr2:202410290-202420696 | q33.1 | 3  | loss | 0 | 1  | not present |
| 24 | 2 | 242,753,511 | 242,762,406 | 8,895   | chr2:242753511-242762406 | q37.3 | 3  | gain | 1 | 4  | present     |
| 25 | 2 | 242,856,588 | 243,038,331 | 181,743 | chr2:242856588-243038331 | q37.3 | 40 | loss | 0 | 1  | present     |
| 26 | 2 | 34,697,718  | 34,730,142  | 32,424  | chr2:34697718-34730142   | p22.3 | 7  | loss | 0 | 7  | present     |
| 27 | 2 | 34,702,930  | 34,730,142  | 27,212  | chr2:34702930-34730142   | p22.3 | 6  | loss | 0 | 2  | present     |
| 28 | 2 | 37,958,541  | 38,002,391  | 43,850  | chr2:37958541-38002391   | p22.2 | 11 | loss | 0 | 3  | present     |
| 29 | 2 | 89,601,864  | 90,265,119  | 663,255 | chr2:89601864-90265119   | p11.2 | 35 | loss | 0 | 2  | present     |
| 30 | 3 | 162,514,534 | 162,611,115 | 96,581  | chr3:162514534-162611115 | q26.1 | 9  | loss | 0 | 12 | present     |
| 31 | 3 | 195,354,124 | 195,454,513 | 100,389 | chr3:195354124-195454513 | q29   | 12 | gain | 2 | 4  | present     |

|    |   |             |             |         |                          |        |    |      |    |    |                |
|----|---|-------------|-------------|---------|--------------------------|--------|----|------|----|----|----------------|
| 32 | 3 | 195,419,168 | 195,444,214 | 25,046  | chr3:195419168-195444214 | q29    | 10 | loss | 2  | 2  | present        |
| 33 | 3 | 37,980,926  | 37,986,165  | 5,239   | chr3:37980926-37986165   | p22.2  | 3  | loss | 1  | 3  | present        |
| 34 | 3 | 46,796,031  | 46,848,728  | 52,697  | chr3:46796031-46848728   | p21.31 | 6  | loss | 0  | 2  | present        |
| 35 | 3 | 56,608,466  | 56,619,604  | 11,138  | chr3:56608466-56619604   | p14.3  | 3  | loss | 0  | 1  | present        |
| 36 | 3 | 75,767,533  | 75,793,273  | 25,740  | chr3:75767533-75793273   | p12.3  | 5  | gain | 0  | 1  | present        |
| 37 | 3 | 89,394,229  | 89,416,802  | 22,573  | chr3:89394229-89416802   | p11.1  | 5  | loss | 1  | 2  | present        |
| 38 | 4 | 131,949,297 | 132,352,577 | 403,280 | chr4:131949297-132352577 | q28.3  | 32 | gain | 0  | 1  | present        |
| 39 | 4 | 186,401,069 | 186,419,493 | 18,424  | chr4:186401069-186419493 | q35.1  | 4  | loss | 0  | 1  | present        |
| 40 | 4 | 190,678,649 | 190,721,966 | 43,317  | chr4:190678649-190721966 | q35.2  | 7  | gain | 0  | 1  | present        |
| 41 | 4 | 34,787,128  | 34,814,779  | 27,651  | chr4:34787128-34814779   | p15.1  | 3  | loss | 0  | 1  | present<br>not |
| 42 | 4 | 39,963,379  | 40,088,977  | 125,598 | chr4:39963379-40088977   | p14    | 26 | gain | 2  | 1  | present        |
| 43 | 4 | 65,418,993  | 65,486,011  | 67,018  | chr4:65418993-65486011   | q13.1  | 10 | gain | 0  | 1  | present        |
| 44 | 4 | 69,387,056  | 69,483,277  | 96,221  | chr4:69387056-69483277   | q13.2  | 12 | loss | 1  | 13 | present        |
| 45 | 4 | 78,115,834  | 78,211,152  | 95,318  | chr4:78115834-78211152   | q21.1  | 19 | loss | 0  | 1  | present        |
| 46 | 5 | 104,274,226 | 104,292,080 | 17,854  | chr5:104274226-104292080 | q21.2  | 3  | loss | 0  | 2  | present        |
| 47 | 5 | 140,223,256 | 140,236,399 | 13,143  | chr5:140223256-140236399 | q31.3  | 4  | loss | 11 | 2  | present        |
| 48 | 5 | 150,204,997 | 150,221,011 | 16,014  | chr5:150204997-150221011 | q33.1  | 4  | loss | 0  | 4  | present        |



|    |   |             |             |           |                          |        |     |      |   |   |                |
|----|---|-------------|-------------|-----------|--------------------------|--------|-----|------|---|---|----------------|
| 49 | 5 | 155,471,484 | 155,488,272 | 16,788    | chr5:155471484-155488272 | q33.2  | 4   | gain | 1 | 1 | present        |
| 50 | 5 | 17,662,300  | 17,697,930  | 35,630    | chr5:17662300-17697930   | p15.1  | 4   | loss | 0 | 1 | present        |
| 51 | 5 | 180,410,254 | 180,429,788 | 19,534    | chr5:180410254-180429788 | q35.3  | 5   | gain | 1 | 3 | present        |
| 52 | 5 | 21,427,452  | 21,524,011  | 96,559    | chr5:21427452-21524011   | p14.3  | 6   | loss | 0 | 1 | present        |
| 53 | 5 | 32,107,383  | 32,167,638  | 60,255    | chr5:32107383-32167638   | p13.3  | 13  | gain | 2 | 2 | present        |
| 54 | 5 | 685,256     | 766,095     | 80,839    | chr5:685256-766095       | p15.33 | 4   | gain | 1 | 2 | present        |
| 55 | 5 | 759,169     | 857,264     | 98,095    | chr5:759169-857264       | p15.33 | 6   | gain | 0 | 2 | present<br>not |
| 56 | 6 | 109,446,615 | 109,546,279 | 99,664    | chr6:109446615-109546279 | q21    | 19  | loss | 0 | 1 | present        |
| 57 | 6 | 111,223,803 | 111,414,820 | 191,017   | chr6:111223803-111414820 | q21    | 37  | gain | 2 | 1 | present        |
| 58 | 6 | 124,436,517 | 124,468,315 | 31,798    | chr6:124436517-124468315 | q22.31 | 8   | gain | 1 | 4 | present        |
| 59 | 6 | 165,725,547 | 165,737,665 | 12,118    | chr6:165725547-165737665 | q27    | 3   | gain | 0 | 1 | present        |
| 60 | 6 | 259,881     | 291,594     | 31,713    | chr6:259881-291594       | p25.3  | 7   | gain | 0 | 5 | present<br>not |
| 61 | 6 | 28,520,009  | 29,615,842  | 1,095,833 | chr6:28520009-29615842   | p22.1  | 195 | gain | 7 | 1 | present        |
| 62 | 6 | 29,854,870  | 29,896,710  | 41,840    | chr6:29854870-29896710   | p22.1  | 8   | loss | 0 | 2 | present        |
| 63 | 6 | 299,363     | 378,956     | 79,593    | chr6:299363-378956       | p25.3  | 18  | loss | 0 | 2 | present        |
| 64 | 6 | 31,349,905  | 31,450,159  | 100,254   | chr6:31349905-31450159   | p21.33 | 16  | loss | 2 | 2 | present        |
| 65 | 6 | 31,785,578  | 31,794,898  | 9,320     | chr6:31785578-31794898   | p21.33 | 4   | loss | 3 | 1 | present        |

|    |   |             |             |         |                          |        |    |      |   |    |             |
|----|---|-------------|-------------|---------|--------------------------|--------|----|------|---|----|-------------|
| 66 | 6 | 32,427,088  | 32,546,882  | 119,794 | chr6:32427088-32546882   | p21.32 | 17 | loss | 2 | 15 | present     |
| 67 | 6 | 32,601,344  | 32,654,142  | 52,798  | chr6:32601344-32654142   | p21.32 | 11 | loss | 2 | 8  | present     |
| 68 | 6 | 56,917,608  | 56,953,602  | 35,994  | chr6:56917608-56953602   | p12.1  | 8  | loss | 0 | 1  | present     |
| 69 | 6 | 78,979,172  | 79,023,328  | 44,156  | chr6:78979172-79023328   | q14.1  | 4  | gain | 0 | 8  | present     |
| 70 | 7 | 109,443,100 | 109,453,033 | 9,933   | chr7:109443100-109453033 | q31.1  | 4  | loss | 0 | 1  | present     |
| 71 | 7 | 119,577,193 | 119,629,793 | 52,600  | chr7:119577193-119629793 | q31.31 | 10 | loss | 0 | 1  | present     |
| 72 | 7 | 133,788,914 | 133,797,387 | 8,473   | chr7:133788914-133797387 | q33    | 3  | gain | 0 | 7  | present     |
| 73 | 7 | 141,750,430 | 141,792,094 | 41,664  | chr7:141750430-141792094 | q34    | 9  | loss | 1 | 2  | present     |
| 74 | 7 | 143,951,931 | 143,953,472 | 1,541   | chr7:143951931-143953472 | q35    | 3  | loss | 0 | 8  | present     |
| 75 | 7 | 152,456,633 | 152,459,393 | 2,760   | chr7:152456633-152459393 | q36.1  | 3  | gain | 0 | 1  | present     |
| 76 | 7 | 20,662,985  | 20,758,193  | 95,208  | chr7:20662985-20758193   | p21.1  | 20 | gain | 1 | 1  | not present |
| 77 | 7 | 53,461,023  | 53,583,184  | 122,161 | chr7:53461023-53583184   | p12.1  | 13 | loss | 0 | 1  | present     |
| 78 | 7 | 64,691,376  | 65,308,719  | 617,343 | chr7:64691376-65308719   | q11.21 | 63 | gain | 1 | 1  | present     |
| 79 | 7 | 76,433,522  | 76,527,501  | 93,979  | chr7:76433522-76527501   | q11.23 | 7  | gain | 0 | 1  | present     |
| 80 | 7 | 85,162,484  | 85,198,014  | 35,530  | chr7:85162484-85198014   | q21.11 | 3  | loss | 0 | 1  | present     |
| 81 | 8 | 137,693,236 | 137,850,185 | 156,949 | chr8:137693236-137850185 | q24.23 | 13 | loss | 0 | 2  | present     |
| 82 | 8 | 144,990,160 | 145,021,210 | 31,050  | chr8:144990160-145021210 | q24.3  | 12 | gain | 2 | 5  | present     |

|    |    |             |             |         |                           |        |    |      |    |    |                           |
|----|----|-------------|-------------|---------|---------------------------|--------|----|------|----|----|---------------------------|
| 83 | 8  | 15,421,661  | 15,433,690  | 12,029  | chr8:15421661-15433690    | p22    | 4  | loss | 1  | 1  | present                   |
| 84 | 8  | 39,234,992  | 39,386,158  | 151,166 | chr8:39234992-39386158    | p11.22 | 28 | loss | 0  | 12 | present                   |
| 85 | 8  | 4,329,470   | 4,357,521   | 28,051  | chr8:4329470-4357521      | p23.2  | 6  | loss | 1  | 2  | present                   |
| 86 | 8  | 7,169,490   | 7,786,708   | 617,218 | chr8:7169490-7786708      | p23.1  | 10 | gain | 10 | 2  | present                   |
| 87 | 8  | 7,239,491   | 7,786,708   | 547,217 | chr8:7239491-7786708      | p23.1  | 9  | loss | 10 | 1  | present                   |
| 88 | 9  | 119,533,116 | 119,562,311 | 29,195  | chr9:119533116-119562311  | q33.1  | 8  | loss | 1  | 1  | present                   |
| 89 | 9  | 139,407,170 | 139,419,558 | 12,388  | chr9:139407170-139419558  | q34.3  | 4  | gain | 1  | 1  | present                   |
| 90 | 9  | 43,505,843  | 43,836,428  | 330,585 | chr9:43505843-43836428    | p12    | 6  | gain | 0  | 2  | present<br>not<br>present |
| 91 | 10 | 101,507,355 | 101,514,326 | 6,971   | chr10:101507355-101514326 | q24.2  | 3  | loss | 1  | 1  | present                   |
| 92 | 10 | 132,360,482 | 132,370,482 | 10,000  | chr10:132360482-132370482 | q26.3  | 3  | gain | 0  | 5  | present                   |
| 93 | 10 | 135,236,007 | 135,378,761 | 142,754 | chr10:135236007-135378761 | q26.3  | 25 | gain | 3  | 1  | present                   |
| 94 | 10 | 46,968,072  | 47,695,889  | 727,817 | chr10:46968072-47695889   | q11.22 | 54 | gain | 3  | 1  | present                   |
| 95 | 10 | 47,007,565  | 47,148,546  | 140,981 | chr10:47007565-47148546   | q11.22 | 25 | gain | 1  | 1  | present                   |
| 96 | 10 | 56,448,627  | 56,468,820  | 20,193  | chr10:56448627-56468820   | q21.1  | 5  | gain | 1  | 1  | present                   |
| 97 | 10 | 59,850,715  | 59,878,505  | 27,790  | chr10:59850715-59878505   | q21.1  | 6  | gain | 0  | 1  | present                   |
| 98 | 11 | 18,949,929  | 18,960,666  | 10,737  | chr11:18949929-18960666   | p15.1  | 3  | loss | 1  | 1  | present                   |
| 99 | 11 | 25,610,678  | 25,622,569  | 11,891  | chr11:25610678-25622569   | p14.3  | 3  | loss | 0  | 2  | present                   |

|     |    |             |             |         |                           |        |    |      |   |    |         |
|-----|----|-------------|-------------|---------|---------------------------|--------|----|------|---|----|---------|
| 100 | 11 | 55,361,638  | 55,450,788  | 89,150  | chr11:55361638-55450788   | q11    | 17 | loss | 0 | 13 | present |
| 101 | 11 | 55,372,753  | 55,430,765  | 58,012  | chr11:55372753-55430765   | q11    | 11 | loss | 0 | 2  | present |
| 102 | 11 | 5,785,900   | 5,805,665   | 19,765  | chr11:5785900-5805665     | p15.4  | 4  | loss | 0 | 6  | present |
| 103 | 11 | 7,815,017   | 7,826,975   | 11,958  | chr11:7815017-7826975     | p15.4  | 6  | loss | 0 | 2  | present |
| 104 | 12 | 10,579,158  | 10,593,748  | 14,590  | chr12:10579158-10593748   | p13.2  | 4  | loss | 1 | 1  | present |
| 105 | 12 | 11,221,333  | 11,249,210  | 27,877  | chr12:11221333-11249210   | p13.2  | 5  | loss | 1 | 13 | present |
| 106 | 12 | 33,960,021  | 34,756,209  | 796,188 | chr12:33960021-34756209   | p11.1  | 43 | gain | 1 | 1  | present |
| 107 | 12 | 9,637,323   | 9,698,517   | 61,194  | chr12:9637323-9698517     | p13.31 | 8  | gain | 0 | 15 | present |
| 108 | 13 | 19,858,137  | 19,892,981  | 34,844  | chr13:19858137-19892981   | q12.11 | 8  | gain | 0 | 1  | present |
| 109 | 13 | 57,760,478  | 57,783,723  | 23,245  | chr13:57760478-57783723   | q21.1  | 5  | loss | 0 | 1  | present |
| 110 | 13 | 63,410,535  | 63,441,072  | 30,537  | chr13:63410535-63441072   | q21.31 | 3  | loss | 0 | 1  | present |
| 111 | 13 | 69,240,911  | 69,263,772  | 22,861  | chr13:69240911-69263772   | q21.33 | 6  | loss | 0 | 2  | present |
| 112 | 13 | 84,115,188  | 84,152,921  | 37,733  | chr13:84115188-84152921   | q31.1  | 4  | loss | 0 | 2  | present |
| 113 | 14 | 106,531,557 | 106,559,103 | 27,546  | chr14:106531557-106559103 | q32.33 | 7  | loss | 1 | 4  | present |
| 114 | 14 | 106,535,379 | 106,653,147 | 117,768 | chr14:106535379-106653147 | q32.33 | 11 | gain | 1 | 1  | present |
| 115 | 14 | 106,785,927 | 106,810,907 | 24,980  | chr14:106785927-106810907 | q32.33 | 3  | gain | 1 | 3  | present |
| 116 | 14 | 106,873,961 | 106,927,426 | 53,465  | chr14:106873961-106927426 | q32.33 | 12 | loss | 1 | 2  | present |

|     |    |             |             |           |                           |        |    |      |   |    |         |
|-----|----|-------------|-------------|-----------|---------------------------|--------|----|------|---|----|---------|
| 117 | 14 | 106,875,948 | 106,931,193 | 55,245    | chr14:106875948-106931193 | q32.33 | 12 | loss | 1 | 1  | present |
| 118 | 14 | 107,148,739 | 107,180,095 | 31,356    | chr14:107148739-107180095 | q32.33 | 7  | gain | 1 | 3  | present |
| 119 | 14 | 19,376,762  | 20,420,849  | 1,044,087 | chr14:19376762-20420849   | q11.2  | 35 | loss | 1 | 10 | present |
| 120 | 14 | 45,189,654  | 45,222,609  | 32,955    | chr14:45189654-45222609   | q21.2  | 3  | loss | 0 | 1  | present |
| 121 | 14 | 74,001,651  | 74,012,568  | 10,917    | chr14:74001651-74012568   | q24.3  | 3  | loss | 1 | 5  | present |
| 122 | 14 | 80,106,284  | 80,113,460  | 7,176     | chr14:80106284-80113460   | q31.1  | 3  | loss | 1 | 2  | present |
| 123 | 14 | 95,103,155  | 95,177,742  | 74,587    | chr14:95103155-95177742   | q32.13 | 11 | gain | 0 | 1  | present |
| 124 | 15 | 102,394,651 | 102,480,888 | 86,237    | chr15:102394651-102480888 | q26.3  | 6  | loss | 0 | 3  | present |
| 125 | 15 | 20,190,548  | 22,332,237  | 2,141,689 | chr15:20190548-22332237   | q11.1  | 70 | loss | 1 | 14 | present |
| 126 | 15 | 20,849,110  | 22,173,977  | 1,324,867 | chr15:20849110-22173977   | q11.2  | 48 | gain | 1 | 1  | present |
| 127 | 15 | 22,168,276  | 22,578,630  | 410,354   | chr15:22168276-22578630   | q11.2  | 37 | gain | 0 | 1  | present |
| 128 | 15 | 24,406,896  | 24,587,080  | 180,184   | chr15:24406896-24587080   | q11.2  | 6  | loss | 1 | 1  | present |
| 129 | 15 | 34,727,647  | 34,795,913  | 68,266    | chr15:34727647-34795913   | q14    | 12 | loss | 0 | 5  | present |
| 130 | 16 | 15,048,676  | 15,120,666  | 71,990    | chr16:15048676-15120666   | p13.11 | 11 | loss | 1 | 1  | present |
| 131 | 16 | 21,475,039  | 21,593,631  | 118,592   | chr16:21475039-21593631   | p12.2  | 6  | loss | 0 | 2  | present |
| 132 | 16 | 32,471,625  | 33,651,765  | 1,180,140 | chr16:32471625-33651765   | p11.2  | 31 | gain | 0 | 10 | present |
| 133 | 16 | 34,472,017  | 34,744,872  | 272,855   | chr16:34472017-34744872   | p11.2  | 22 | gain | 0 | 3  | present |

|     |    |            |            |         |                         |        |    |      |   |    |                |
|-----|----|------------|------------|---------|-------------------------|--------|----|------|---|----|----------------|
| 134 | 16 | 55,799,203 | 55,822,392 | 23,189  | chr16:55799203-55822392 | q12.2  | 6  | loss | 0 | 4  | present        |
| 135 | 16 | 55,842,389 | 55,848,225 | 5,836   | chr16:55842389-55848225 | q12.2  | 3  | gain | 1 | 2  | present        |
| 136 | 16 | 70,155,006 | 70,193,942 | 38,936  | chr16:70155006-70193942 | q22.1  | 5  | loss | 0 | 2  | present        |
| 137 | 16 | 72,095,998 | 72,107,365 | 11,367  | chr16:72095998-72107365 | q22.2  | 3  | gain | 1 | 1  | present        |
| 138 | 16 | 74,394,080 | 74,407,341 | 13,261  | chr16:74394080-74407341 | q23.1  | 3  | loss | 0 | 2  | present        |
| 139 | 16 | 75,538,398 | 75,572,540 | 34,142  | chr16:75538398-75572540 | q23.1  | 8  | gain | 2 | 1  | present        |
| 140 | 16 | 78,372,097 | 78,381,281 | 9,184   | chr16:78372097-78381281 | q23.1  | 3  | loss | 1 | 4  | present<br>not |
| 141 | 16 | 83,200,264 | 83,207,885 | 7,621   | chr16:83200264-83207885 | q23.3  | 3  | loss | 1 | 1  | present        |
| 142 | 16 | 88,747,384 | 88,763,519 | 16,135  | chr16:88747384-88763519 | q24.3  | 5  | loss | 1 | 1  | present<br>not |
| 143 | 17 | 10,410,275 | 10,434,595 | 24,320  | chr17:10410275-10434595 | p13.1  | 7  | gain | 2 | 1  | present        |
| 144 | 17 | 34,437,475 | 34,475,514 | 38,039  | chr17:34437475-34475514 | q12    | 7  | gain | 0 | 1  | present        |
| 145 | 17 | 44,165,726 | 44,210,822 | 45,096  | chr17:44165726-44210822 | q21.31 | 17 | loss | 1 | 10 | present        |
| 146 | 17 | 78,093,616 | 78,109,158 | 15,542  | chr17:78093616-78109158 | q25.3  | 5  | gain | 2 | 1  | present        |
| 147 | 19 | 20,607,860 | 20,701,620 | 93,760  | chr19:20607860-20701620 | p12    | 8  | loss | 0 | 2  | present        |
| 148 | 19 | 20,830,072 | 20,996,917 | 166,845 | chr19:20830072-20996917 | p12    | 31 | gain | 0 | 1  | present        |
| 149 | 19 | 35,847,189 | 35,861,544 | 14,355  | chr19:35847189-35861544 | q13.12 | 4  | loss | 1 | 2  | present        |
| 150 | 19 | 50,426,600 | 50,472,122 | 45,522  | chr19:50426600-50472122 | q13.33 | 11 | gain | 4 | 1  | present        |

|     |    |             |             |           |                          |        |    |      |   |    |                                             |
|-----|----|-------------|-------------|-----------|--------------------------|--------|----|------|---|----|---------------------------------------------|
| 151 | 19 | 52,136,261  | 52,148,589  | 12,328    | chr19:52136261-52148589  | q13.41 | 3  | loss | 0 | 2  | present                                     |
| 152 | 19 | 53,522,243  | 53,550,020  | 27,777    | chr19:53522243-53550020  | q13.41 | 6  | gain | 0 | 1  | present                                     |
| 153 | 19 | 53,927,854  | 54,005,410  | 77,556    | chr19:53927854-54005410  | q13.42 | 14 | gain | 0 | 1  | present                                     |
| 154 | 19 | 54,730,830  | 54,742,404  | 11,574    | chr19:54730830-54742404  | q13.42 | 3  | loss | 0 | 2  | present<br>not<br>present                   |
| 155 | 19 | 6,377,061   | 6,386,806   | 9,745     | chr19:6377061-6386806    | p13.3  | 3  | gain | 1 | 1  | present                                     |
| 156 | 20 | 1,551,034   | 1,580,958   | 29,924    | chr20:1551034-1580958    | p13    | 7  | gain | 1 | 14 | present                                     |
| 157 | 20 | 60,924,636  | 60,935,883  | 11,247    | chr20:60924636-60935883  | q13.33 | 3  | gain | 1 | 2  | present                                     |
| 158 | 21 | 10,861,051  | 11,056,805  | 195,754   | chr21:10861051-11056805  | p11.2  | 12 | gain | 1 | 1  | present                                     |
| 159 | 22 | 16,133,474  | 17,340,318  | 1,206,844 | chr22:16133474-17340318  | q11.1  | 36 | loss | 3 | 1  | present                                     |
| 160 | 22 | 24,390,255  | 24,395,353  | 5,098     | chr22:24390255-24395353  | q11.23 | 1  | loss | 0 | 11 | present                                     |
| 161 | 22 | 25,664,618  | 25,919,542  | 254,924   | chr22:25664618-25919542  | q11.23 | 54 | gain | 0 | 1  | present<br>not<br>present<br>not<br>present |
| 162 | 22 | 30,332,258  | 30,360,514  | 28,256    | chr22:30332258-30360514  | q12.2  | 7  | loss | 1 | 1  | present<br>not<br>present                   |
| 163 | 22 | 35,829,283  | 35,860,068  | 30,785    | chr22:35829283-35860068  | q12.3  | 5  | gain | 0 | 5  | present                                     |
| 164 | 22 | 39,359,112  | 39,385,485  | 26,373    | chr22:39359112-39385485  | q13.1  | 6  | loss | 2 | 2  | present                                     |
| 165 | 22 | 42,896,699  | 42,949,585  | 52,886    | chr22:42896699-42949585  | q13.2  | 8  | gain | 1 | 4  | present                                     |
| 166 | X  | 103,258,679 | 103,303,380 | 44,701    | chrX:103258679-103303380 | q22.2  | 11 | gain | 1 | 2  | present                                     |
| 167 | X  | 119,037,491 | 119,055,778 | 18,287    | chrX:119037491-119055778 | q24    | 5  | gain | 1 | 1  | present                                     |

|     |   |             |             |         |                          |        |    |      |   |    |                |
|-----|---|-------------|-------------|---------|--------------------------|--------|----|------|---|----|----------------|
| 168 | X | 154,788     | 169,113     | 14,325  | chrX:154788-169113       | p22.33 | 5  | gain | 0 | 1  | present        |
| 169 | X | 154,946,353 | 155,226,048 | 279,695 | chrX:154946353-155226048 | q28    | 39 | gain | 2 | 1  | present        |
| 170 | X | 159,430     | 216,099     | 56,669  | chrX:159430-216099       | p22.33 | 21 | gain | 0 | 2  | present<br>not |
| 171 | X | 184,528     | 187,823     | 3,295   | chrX:184528-187823       | p22.33 | 3  | gain | 0 | 1  | present<br>not |
| 172 | X | 52,858,608  | 52,905,175  | 46,567  | chrX:52858608-52905175   | p11.22 | 9  | gain | 1 | 1  | present<br>not |
| 173 | X | 56,093,719  | 56,098,999  | 5,280   | chrX:56093719-56098999   | p11.21 | 3  | loss | 0 | 1  | present        |
| 174 | X | 61,091      | 170,147     | 109,056 | chrX:61091-170147        | p22.33 | 16 | gain | 0 | 3  | present        |
| 175 | X | 62,405,221  | 62,501,768  | 96,547  | chrX:62405221-62501768   | q11.1  | 4  | gain | 0 | 1  | present<br>not |
| 176 | X | 69,956,055  | 70,045,530  | 89,475  | chrX:69956055-70045530   | q13.1  | 14 | loss | 1 | 1  | present        |
| 177 | X | 70,397      | 169,113     | 98,716  | chrX:70397-169113        | p22.33 | 13 | gain | 0 | 13 | present<br>not |
| 178 | Y | 11,091      | 11,528      | 437     | chrY:11091-11528         | p11.32 | 1  | gain | 0 | 3  | present<br>not |
| 179 | Y | 11,529      | 120,147     | 108,618 | chrY:11529-120147        | p11.32 | 15 | gain | 0 | 1  | present<br>not |
| 180 | Y | 20,397      | 163,421     | 143,024 | chrY:20397-163421        | p11.32 | 30 | gain | 0 | 6  | present        |
| 181 | Y | 9,641,061   | 9,650,194   | 9,133   | chrY:9641061-9650194     | p11.2  | 3  | loss | 0 | 1  | present        |



Table S4. qPCR analysis of exons 10-12 of *TEX11* isoform 1 (NM\_001003811.1).

| Exon    | CONTROL           | Ct- <i>TEX11</i> ex10 |        |        |        | Avg. Ct | St. Dev. | Ct- bACT |        |        |        | Avg. Ct | St. Dev. | DCt   | DDCt  | Fold change |
|---------|-------------------|-----------------------|--------|--------|--------|---------|----------|----------|--------|--------|--------|---------|----------|-------|-------|-------------|
|         |                   | well 1                | well 2 | well 3 | well 4 |         |          | well 1   | well 2 | well 3 | well 4 |         |          |       |       |             |
| Exon 10 | Agilent Control   | 29.76                 | 29.43  | 28.93  | 29.86  | 29.49   | 0.42     | 28.05    | 28.00  | 27.87  | 28.11  | 28.01   | 0.10     | 1.49  | 0.00  | 1.00        |
|         | UNKNOWN           | Ct- <i>TEX11</i> ex10 |        |        |        | Avg. Ct | St. Dev. | Ct- bACT |        |        |        | Avg. Ct | St. Dev. | DCt   | DDCt  | Fold change |
|         |                   | well 1                | well 2 | well 3 | well 4 |         |          | well 1   | well 2 | well 3 | well 4 |         |          |       |       |             |
|         | P1 (p.218del79aa) | 40                    | 40     | 40     | 40     | 40.00   | 0.00     | 28.65    | 28.37  | *      | 28.24  | 28.42   | 0.21     | 11.58 | 10.09 | 0.00        |
|         | P3 (p.218del79aa) | 40                    | 40     | 40     | 40     | 40.00   | 0.00     | 28.96    | 28.02  | 28.99  | 28.93  | 28.72   | 0.47     | 11.28 | 9.79  | 0.00        |
|         | Control 1         | 29.78                 | 29.77  | 29.69  | 29.69  | 29.73   | 0.05     | 28.14    | 28.21  | 28.61  | 28.42  | 28.34   | 0.21     | 1.39  | -0.10 | 1.07        |
|         | Control 2         | 29.84                 | 29.44  | 29.14  | 29.40  | 29.46   | 0.29     | 28.10    | 28.27  | 28.35  | 28.08  | 28.20   | 0.13     | 1.26  | -0.23 | 1.18        |
|         | Control 3         | 29.65                 | 29.77  | 29.31  | 28.90  | 29.41   | 0.39     | 28.28    | 28.23  | 28.36  | 28.29  | 28.29   | 0.05     | 1.12  | -0.37 | 1.30        |
| Exon 11 | Agilent Control   | 32.10                 | 32.60  | 31.46  | 31.13  | 31.82   | 0.66     | 28.05    | 28.00  | 27.87  | 28.11  | 28.01   | 0.10     | 3.82  | 0.00  | 1.00        |
|         | UNKNOWN           | Ct- <i>TEX11</i> ex11 |        |        |        | Avg. Ct | St. Dev. | Ct- bACT |        |        |        | Avg. Ct | St. Dev. | DCt   | DDCt  | Fold change |
|         |                   | well 1                | well 2 | well 3 | well 4 |         |          | well 1   | well 2 | well 3 | well 4 |         |          |       |       |             |
|         | P1 (p.218del79aa) | 40                    | 40     | 40     | 40     | 40.00   | 0.00     | 28.65    | 28.37  | *      | 28.24  | 28.42   | 0.21     | 11.58 | 7.76  | 0.00        |
|         | P3 (p.218del79aa) | 40                    | 40     | 40     | 40     | 40.00   | 0.00     | 28.96    | 28.02  | 28.99  | 28.93  | 28.72   | 0.47     | 11.28 | 7.46  | 0.01        |
|         | Control 1         | 31.74                 | 31.51  | 31.86  | 31.71  | 31.70   | 0.15     | 28.14    | 28.21  | 28.61  | 28.42  | 28.34   | 0.21     | 3.36  | -0.46 | 1.37        |
|         | Control 2         | 31.82                 | 31.73  | 31.74  | 31.63  | 31.73   | 0.08     | 28.10    | 28.27  | 28.35  | 28.08  | 28.20   | 0.13     | 3.53  | -0.29 | 1.23        |
|         | Control 3         | 31.74                 | 32.12  | 31.57  | 31.76  | 31.80   | 0.23     | 28.28    | 28.23  | 28.36  | 28.29  | 28.29   | 0.05     | 3.51  | -0.31 | 1.24        |
| Exon 12 | Agilent Control   | 24.57                 | 24.68  | 24.65  | 24.83  | 24.68   | 0.11     | 28.05    | 28.00  | 27.87  | 28.11  | 28.01   | 0.10     | -3.32 | 0.00  | 1.00        |
|         | UNKNOWN           | Ct- <i>TEX11</i> ex12 |        |        |        | Avg. Ct | St. Dev. | Ct- bACT |        |        |        | Avg. Ct | St. Dev. | DCt   | DDCt  | Fold change |
|         |                   | well 1                | well 2 | well 3 | well 4 |         |          | well 1   | well 2 | well 3 | well 4 |         |          |       |       |             |
|         | P1 (p.218del79aa) | 35.19                 | 37.12  | 35.91  | 36.20  | 36.10   | 0.80     | 28.65    | 28.37  | *      | 28.24  | 28.42   | 0.21     | 7.68  | 11.01 | 0.00        |
|         | P3 (p.218del79aa) | 35.48                 | 37.06  | 40.00  | 34.86  | 36.85   | 2.30     | 28.96    | 28.02  | 28.99  | 28.93  | 28.72   | 0.47     | 8.13  | 11.45 | 0.00        |
|         | Control 1         | 24.77                 | 24.84  | 24.95  | 25.01  | 24.89   | 0.11     | 28.14    | 28.21  | 28.61  | 28.42  | 28.34   | 0.21     | -3.45 | -0.13 | 1.09        |
|         | Control 2         | 24.52                 | 24.49  | 24.54  | 24.66  | 24.55   | 0.08     | 28.10    | 28.27  | 28.35  | 28.08  | 28.20   | 0.13     | -3.65 | -0.33 | 1.25        |
|         | Control 3         | 24.92                 | 24.90  | 25.03  | 25.14  | 25.00   | 0.11     | 28.28    | 28.23  | 28.36  | 28.29  | 28.29   | 0.05     | -3.29 | 0.03  | 0.98        |

**Table S5. Polymorphic variants found in AZ patients and controls.**

| <b>DNA change</b> | <b>Exon</b> | <b>RNA/Protein</b> | <b>Patients (%)</b> | <b>Controls (%)</b> | <b>dbSNP</b> | <b>ESP6500 Minor Allele frequency (EU ethnic /AA/Overall) (%)</b> |
|-------------------|-------------|--------------------|---------------------|---------------------|--------------|-------------------------------------------------------------------|
| c.389A>G          | ex5         | p.K130R            | 4.50%               | 3.1%                | rs6525433    | 0.9367/36.2712/13.7676                                            |
| c.1351G>A         | ex15        | p.E451K            | 4.50%               | 3.1%                | rs4844247    | 3.909/10.6649/6.3618                                              |
| c.2541T>C         | ex27        | p.D847D            | 5.60%               | 5.20%               | rs16991177   | 4.2658/10.3259/6.466                                              |
| c.2566-3T>C       | ex28        | intron 27          | 3.26%               | 6.77%               | rs1536250    | 9.6611/29.9087/17.0122                                            |
| c.2566-4A>T       | ex28        | intron 27          | 3.26%               | 6.77%               | rs1536251    | 9.2301/29.8305/16.7093                                            |
